# Supplementary material for: Design and synthesis of cation-functionalized ionic liquid for application as electrolyte in proton exchange membrane fuel cells
Source: Royal Society of Chemistry journal article supplement (doi:10.1039/c4ta04967e), 2014-01-01
Supplement: c4ta04967e1.pdf [file c4ta04967e1.pdf]

## Design and synthesis of cation-functionalized ionic liquid for application as electrolyte in proton exchange membrane fuel cell

Jian Gao<sup>a,b</sup>, Gang Wang<sup>a</sup>, Zhongwei Wang<sup>a</sup>, Yuantao Wang<sup>a</sup>, Jianguo Liu<sup>a\*</sup>, Wenming Liu<sup>a</sup>, Zhigang Zou<sup>a\*\*</sup>

### Supporting Information

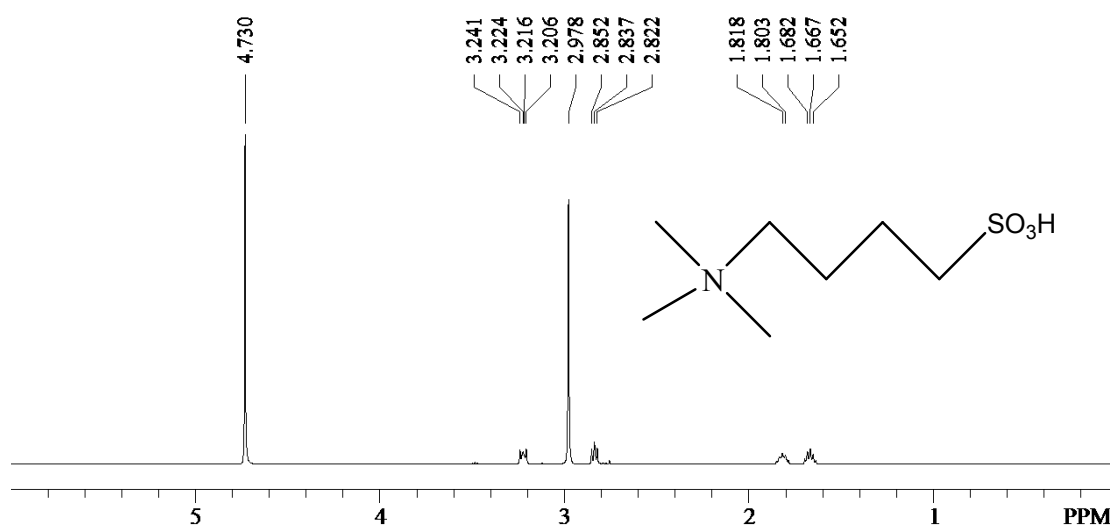

$\delta$ H (500 MHz, D<sub>2</sub>O) 4.73(D), 3.24-3.20 (m, 2H NCH<sub>2</sub>CH<sub>2</sub>CH<sub>2</sub>CH<sub>2</sub>SO<sub>3</sub>H;), 2.978(s, 9H; N(CH<sub>3</sub>)<sub>3</sub>), 2.852-2.822 (t, 2H; NCH<sub>2</sub>CH<sub>2</sub>CH<sub>2</sub>CH<sub>2</sub>SO<sub>3</sub>H), 1.81-1.80 (d, 2H; NCH<sub>2</sub>CH<sub>2</sub>CH<sub>2</sub>CH<sub>2</sub>SO<sub>3</sub>H), 1.68-1.65 (t, 2H; NCH<sub>2</sub>CH<sub>2</sub>CH<sub>2</sub>CH<sub>2</sub>SO<sub>3</sub>H).

<sup>1</sup>H NMR for [N1114SO<sub>3</sub>H]HSO<sub>4</sub>

Element analysis

|                 | C     | H    | N    | S     |
|-----------------|-------|------|------|-------|
| Calculated(wt%) | 28.64 | 6.47 | 4.77 | 21.82 |
| Measured(wt)    | 28.53 | 6.22 | 4.81 | 21.93 |
